# Supplementary material
Source: PubMed Central journal article supplement (PMC5587413)
Supplement: NIHMS881911-supplement-1.pdf [file NIHMS881911-supplement-1.pdf]

# Supplemental Figure 1

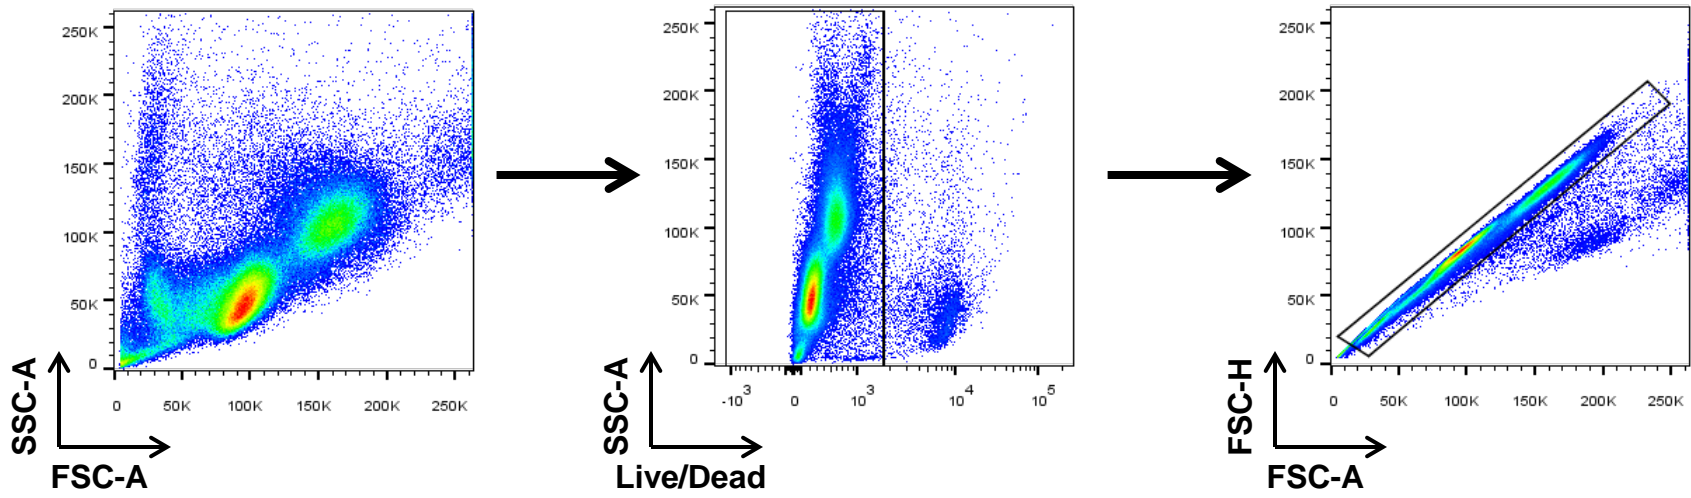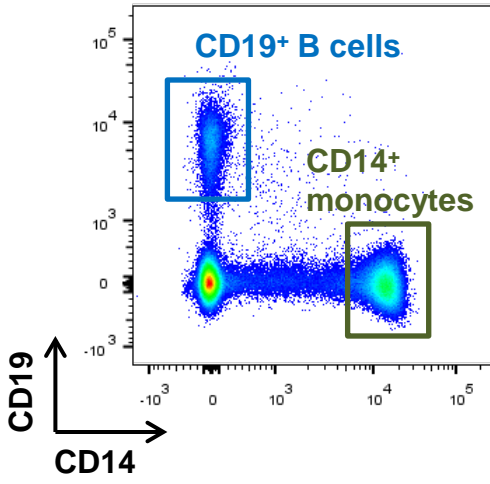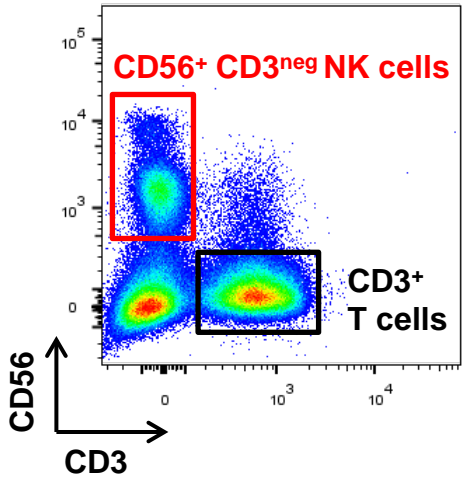

**Supplemental Figure 1. Gating Strategy for human PBMCs.** Shown is the flow cytometry gating strategy for detecting CD19<sup>+</sup> B cells, CD14<sup>+</sup> monocytes, CD56<sup>+</sup>CD3<sup>neg</sup> NK cells and CD3<sup>+</sup> T cells in human peripheral blood samples.
