# Supplementary material
Source: PubMed Central journal article supplement (PMC5587413)
Supplement: NIHMS881911-supplement-3.pdf [file NIHMS881911-supplement-3.pdf]

# Supplemental Figure 3

a

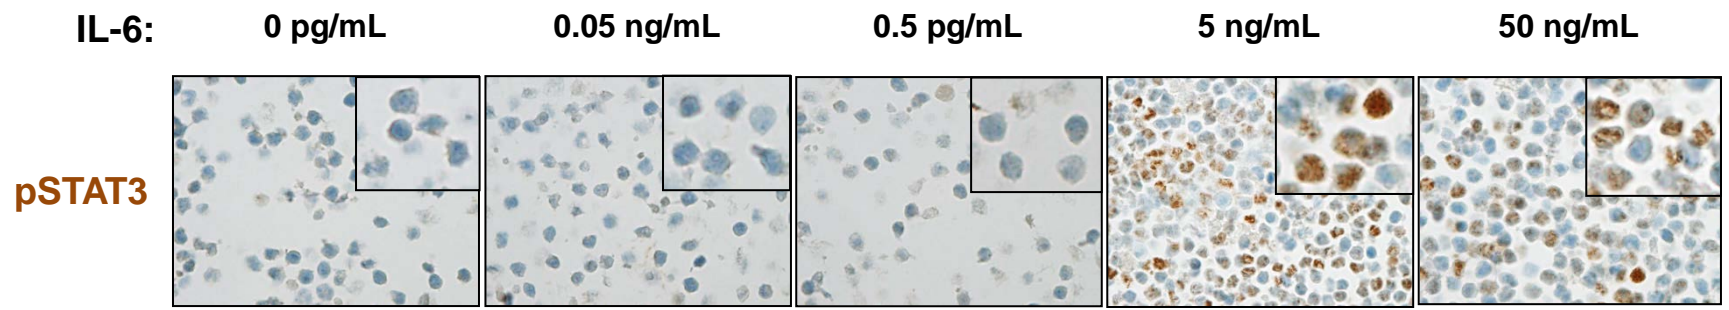

b

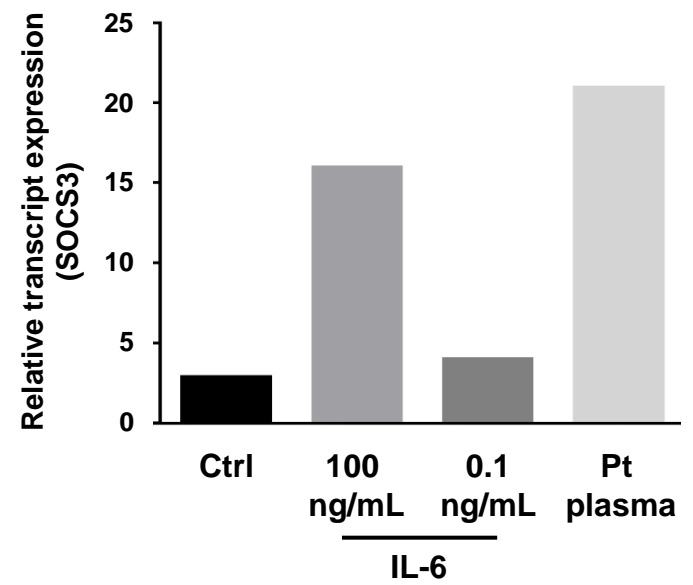

**Supplemental Figure 3. IL-6 activation of STAT3/SOCS3 in human monocytes.** (a) Shown are representative immunohistochemistry images of pSTAT3 (brown) detected in human monocytes after 30 minutes treatment in serum free media with defined concentrations of human recombinant IL-6. Nuclei are counterstained with hematoxylin (blue). (b) Expression of SOCS3 in human monocytes incubated for 30 minutes with media alone (Ctrl), IL-6 (100 ng/mL or 0.1 ng/mL), or plasma from a PDAC patient with an IL-6 concentration of 0.15 ng/mL. SOCS3 expression was normalized to GAPDH.
