# Supplementary material
Source: PubMed Central journal article supplement (PMC5587413)
Supplement: NIHMS881911-supplement-4.pdf [file NIHMS881911-supplement-4.pdf]

# Supplemental Figure 4

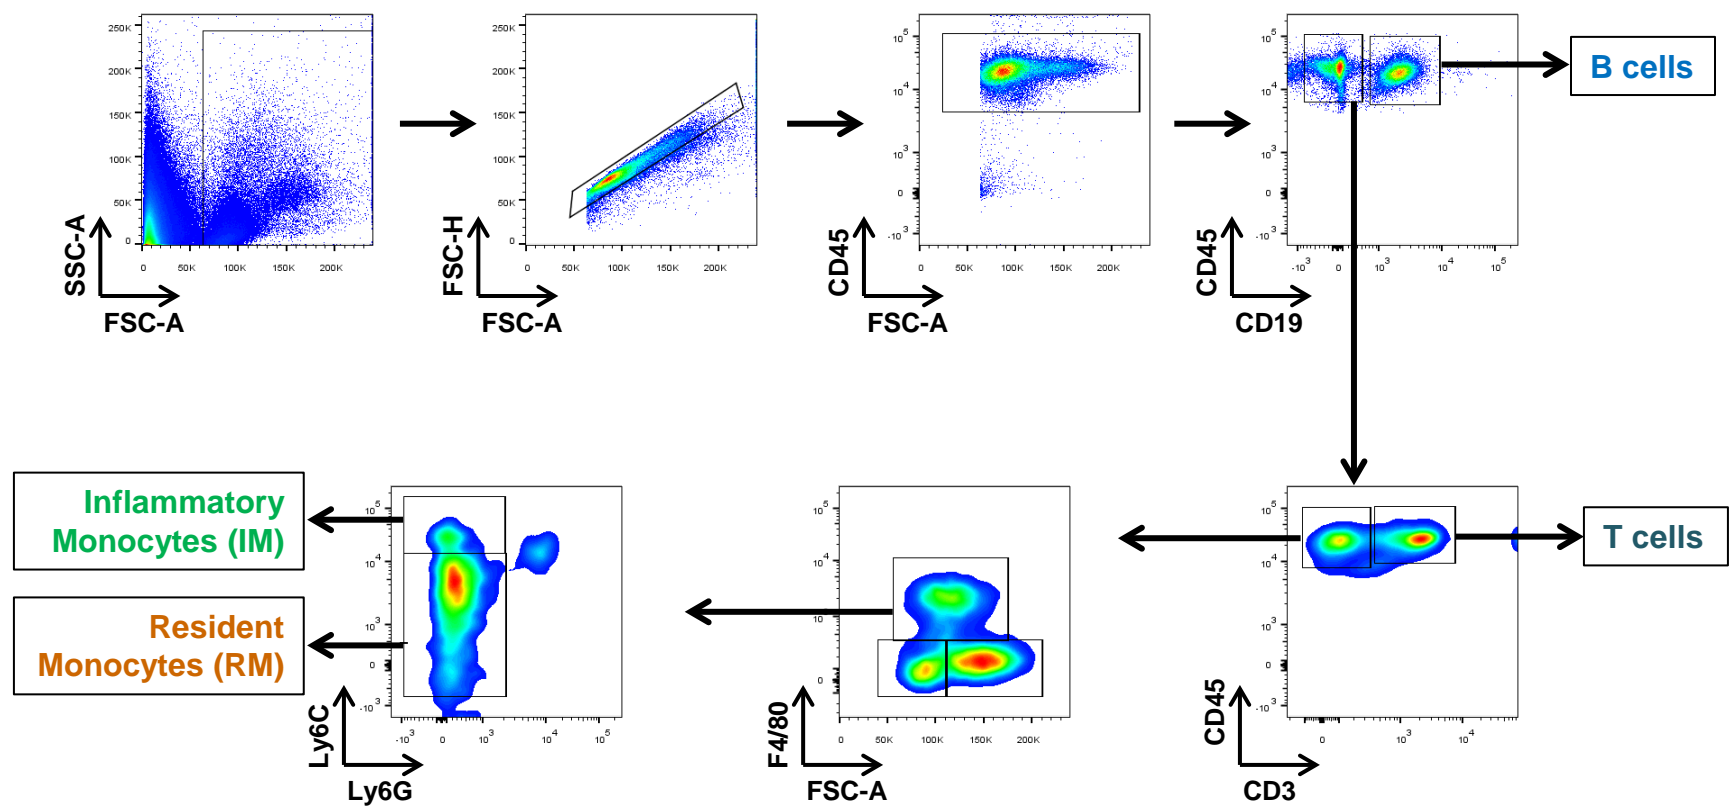

**Supplemental Figure 4. Gating Strategy for mouse PBMCs.** Shown is the flow cytometry gating strategy for detecting CD19<sup>+</sup> B cells, CD3<sup>+</sup> T cells, F4/80<sup>+</sup>Ly6C<sup>hi</sup> inflammatory monocytes (IM), and F4/80<sup>+</sup>Ly6C<sup>lo</sup> resident monocytes (RM) in mouse peripheral blood samples.
