# Supplementary material
Source: PubMed Central journal article supplement (PMC5587413)
Supplement: NIHMS881911-supplement-5.pdf [file NIHMS881911-supplement-5.pdf]

## Supplemental Figure 5

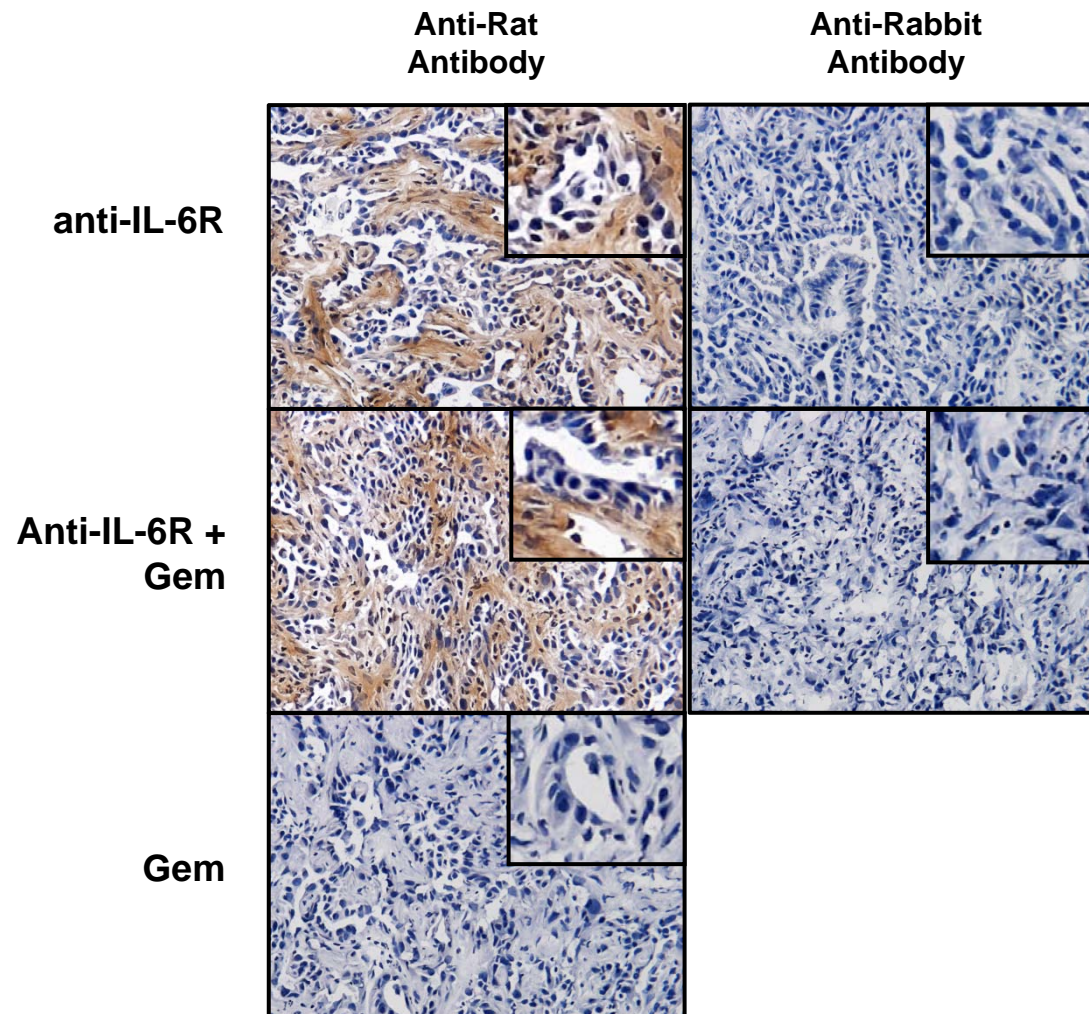

**Supplemental Figure 5. Anti-IL-6Ralpha antibodies can be detected in stromal tissue surrounding malignant PDAC cells.** Mice with implanted PDAC tumors were treated with or without anti-IL-6Ralpha monoclonal antibody (clone 15A7, rat antibody) on days -3 and 0. Gemcitabine (Gem) was administered on day 0 and tumors were harvested one day later. Shown are representative DAB immunohistochemistry images to detect rat IgG (left) or rabbit IgG (right) antibodies as control.
