# Supplementary material
Source: PubMed Central journal article supplement (PMC5587413)
Supplement: NIHMS881911-supplement-6.pdf [file NIHMS881911-supplement-6.pdf]

**Supplemental Figure 6**

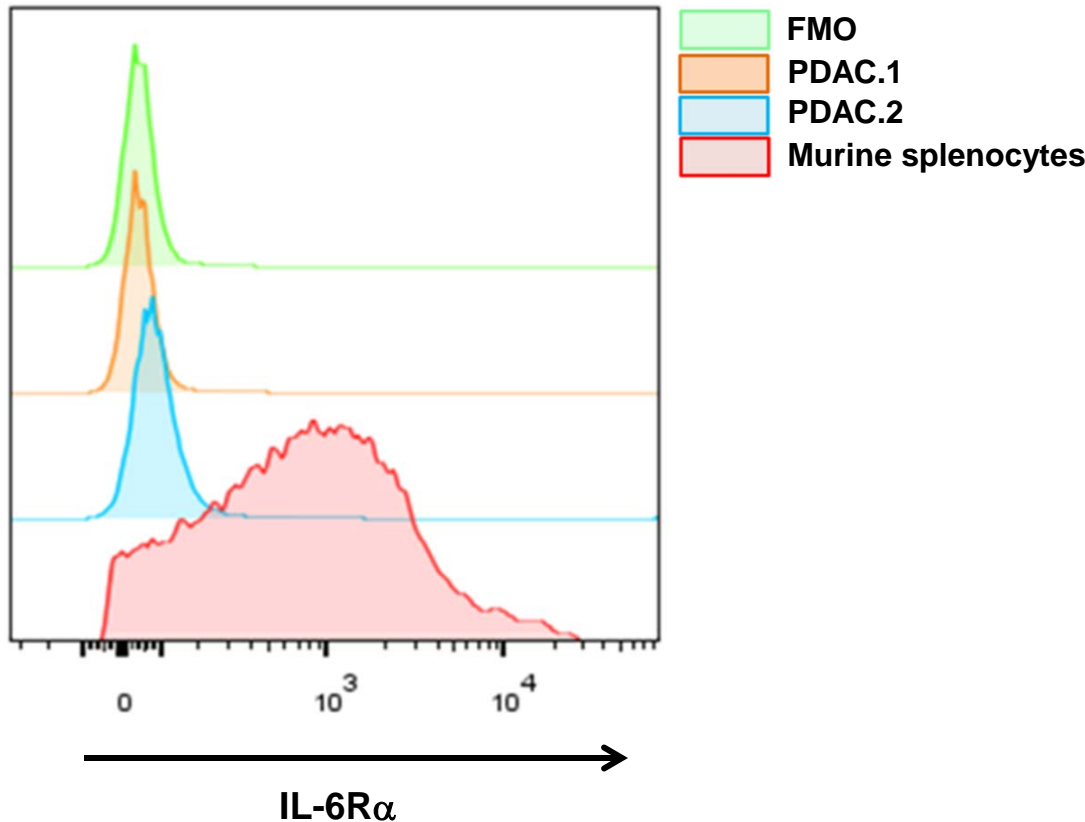

**Supplemental Figure 6. IL-6R $\alpha$  expression on murine PDAC cell lines.** Shown is a flow cytometry histogram of IL-6R $\alpha$  expression detected on the surface of two murine KPC-derived PDAC cells with comparison to splenocytes and fluorescence minus one (FMO) control.
