# Supplementary material
Source: PubMed Central journal article supplement (PMC5587413)
Supplement: NIHMS881911-supplement-7.pdf [file NIHMS881911-supplement-7.pdf]

**Supplemental Figure 7**

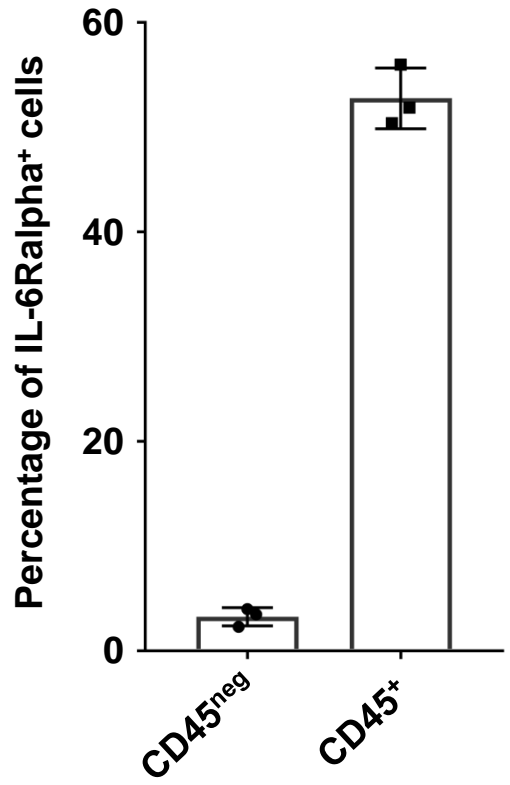

**Supplemental Figure 7. IL-6Ralpha expression in murine PDAC tumors.** Shown is IL-6Ralpha expression detected by flow cytometry on CD45<sup>neg</sup> (including tumor cells, fibroblasts, and endothelial cells) and CD45<sup>+</sup> cells isolated from KPC-derived PDAC tumors implanted subcutaneously into syngeneic mice.
